# Supplementary material
Source: publisher site journal article supplement (https://www.dovepress.com/article/441302)

**Supplementary Table 1** The average of binding free energy of PiuA-TLR2 complex and PiuA-TLR4 complex obtained using MM-PBSA.

|  | Van der Waal energy  (kJ/mol) | Electrostatic energy  (kJ/mol) | Polar solvation energy  (kJ/mol) | SASA energy  (kJ/mol) | Binding energy  (kJ/mol) |
| --- | --- | --- | --- | --- | --- |
| PiuA-TLR2 | -316.956±41.961 | 703.043±188.424 | 711.955±121.86 | -65.067±6.338 | 1355.285±68.108 |
| PiuA-TLR4 | -561.938±45.063 | 848.761±351.515 | 1668.285±238.112 | -122.369±8.708 | 2812.355±168.039 |


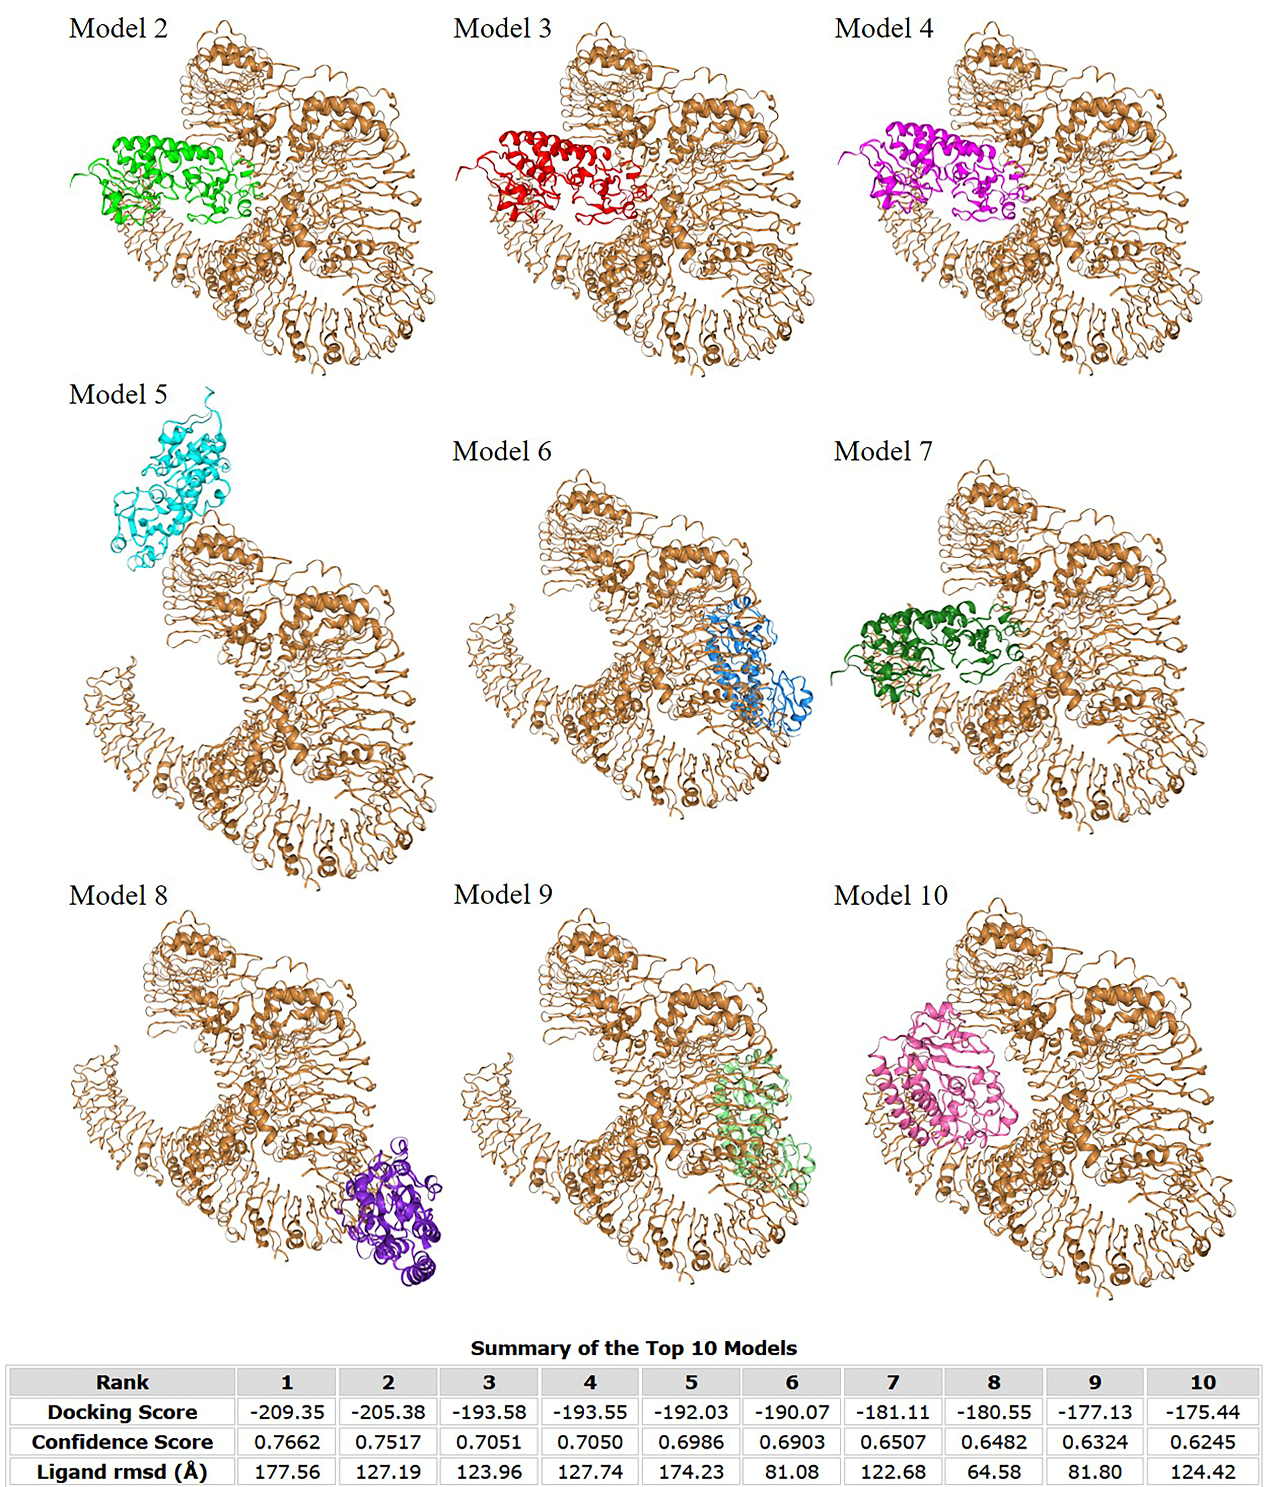
**Supplementary Figure 1** Top 10 predictions in HDOCK for PiuA-TLR2.

**Supplementary Figure 2** Top 10 predictions in HDOCK for PiuA-TLR4.


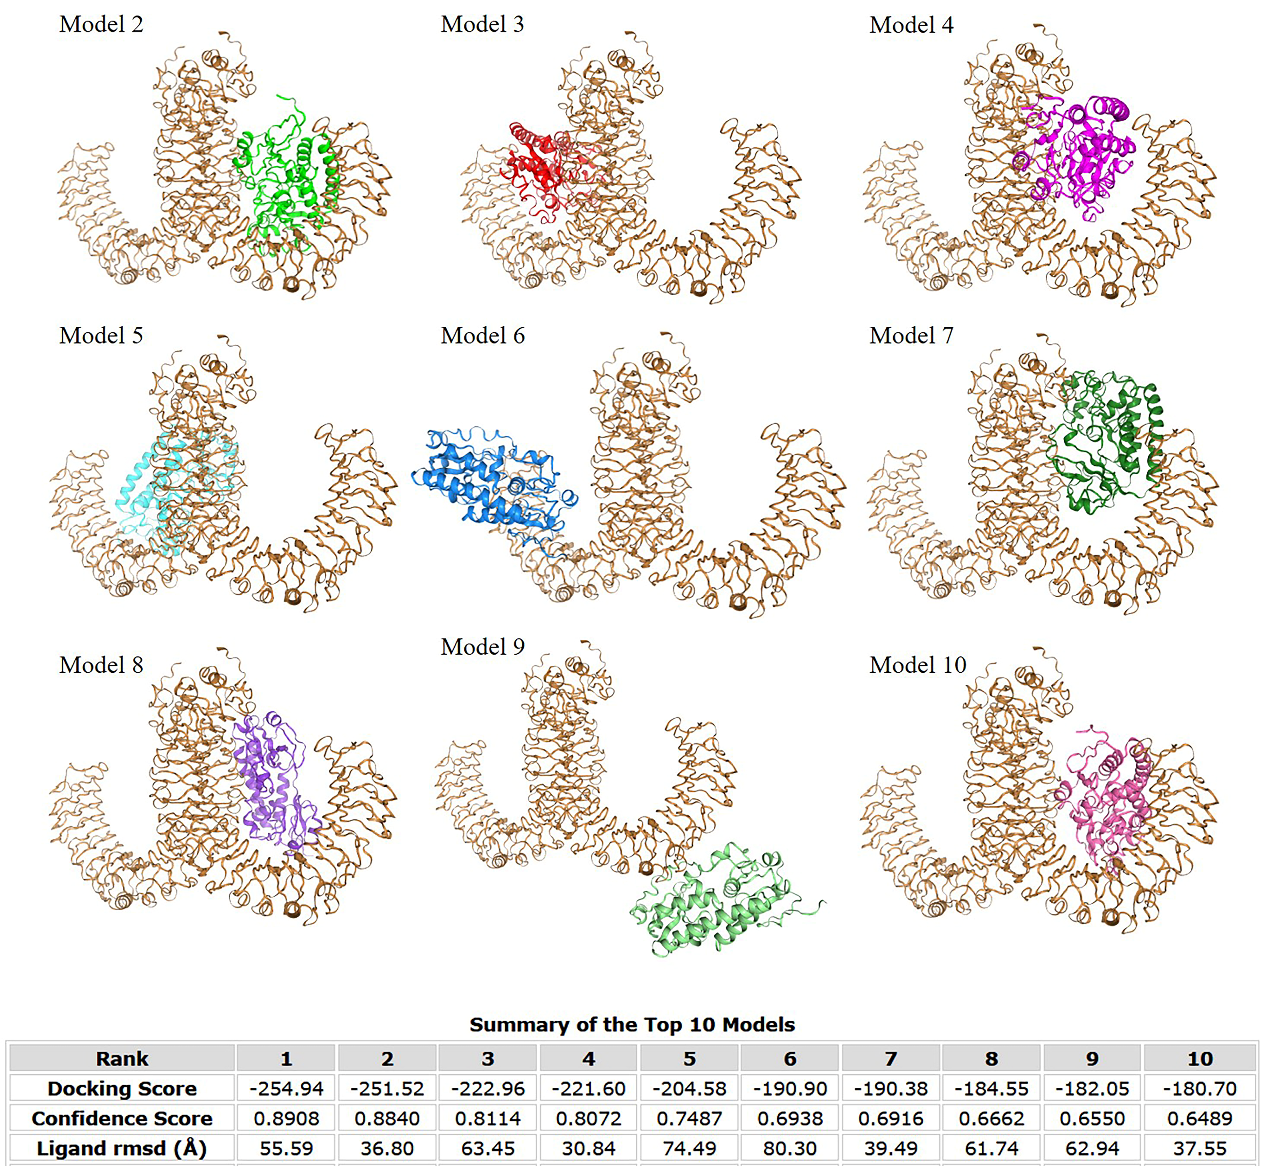

Supplement: Supplementary file 1 [file get_supplementary_file.php]
